# Supplementary material
Source: Elsevier journal article supplement (https://www.sciencedirect.com/science/article/pii/S2173574318301205)
Supplement: mmc1 [file S2173574318301205:mmc1.pdf]

**Terapias biológicas disponibles para el tratamiento de las Espondiloartritis (EspA), según ficha técnica.**

| Terapia biológica | Principio activo | Posología y administración                                                                                                                                                                                                           | Indicaciones                                                                                                                                                                                                                                                             | Contraindicaciones                                                                                                                                                                                                                              | Eventos adversos*                                                                                                                                                                                                                                                                                                                                                                                               |
|-------------------|------------------|--------------------------------------------------------------------------------------------------------------------------------------------------------------------------------------------------------------------------------------|--------------------------------------------------------------------------------------------------------------------------------------------------------------------------------------------------------------------------------------------------------------------------|-------------------------------------------------------------------------------------------------------------------------------------------------------------------------------------------------------------------------------------------------|-----------------------------------------------------------------------------------------------------------------------------------------------------------------------------------------------------------------------------------------------------------------------------------------------------------------------------------------------------------------------------------------------------------------|
| Anti-TNF alfa     | Adalimumab       | <ul style="list-style-type: none"> <li>– Dosis: 40 mg</li> <li>– Vía: subcutánea</li> <li>– Frecuencia: cada 2 semanas.</li> </ul>                                                                                                   | <ul style="list-style-type: none"> <li>– EA activa grave con respuesta insuficiente a la terapia convencional.</li> <li>-EspAax-nr grave, con signos objetivos de inflamación (PCR elevada y/o imagen por RM) con respuesta inadecuada o intolerantes a AINE.</li> </ul> | <ul style="list-style-type: none"> <li>– Hipersensibilidad al principio activo o excipientes.</li> <li>– TBC activa, infecciones graves como sepsis e infecciones oportunistas.</li> <li>– IC moderada a grave (NYHA clases III/IV).</li> </ul> | <ul style="list-style-type: none"> <li>– Muy frecuentes: reacción en el lugar de inyección (dolor, enrojecimiento).</li> <li>– Frecuentes: cefalea, infección respiratoria, urinaria, herpes, diarrea.</li> <li>– Poco frecuentes: LES, TBC, arritmia, sepsis, citopenia.</li> <li>– Raros: ICC, esclerosis múltiple, linfoma, tumor sólido maligno.</li> </ul>                                                 |
|                   | Certolizumab     | <ul style="list-style-type: none"> <li>-Dosis: 200 mg o 400 mg.</li> <li>-Vía: subcutánea.</li> <li>-Frecuencia: Inicial (400 mg en las semanas 0, 2 y 4). Mantenimiento (200 mg cada 2 semanas o 400 mg cada 4 semanas).</li> </ul> | <ul style="list-style-type: none"> <li>-EA activa grave con respuesta inadecuada a AINE.</li> <li>-EspAax-nr grave, con signos objetivos de inflamación (PCR elevada y/o imagen por RM) con respuesta inadecuada o intolerantes a AINE.</li> </ul>                       | <ul style="list-style-type: none"> <li>– Hipersensibilidad al principio activo o excipientes.</li> <li>– TBC activa, infecciones graves como sepsis e infecciones oportunistas.</li> <li>– IC moderada a grave (NYHA clases III/IV).</li> </ul> | <ul style="list-style-type: none"> <li>-Muy frecuentes: ninguno.</li> <li>-Frecuentes: infecciones bacterianas y víricas, leucopenias, cefalea, HTA, náuseas.</li> <li>-Poco frecuentes: sepsis, TBC, infecciones fúngicas, Neoplasias del sistema linfático, tumores sólidos, cánceres de piel no melanoma.</li> <li>-Raros: pancitopenia, esplenomegalia, melanoma, pericarditis, EPI, neumonitis.</li> </ul> |
|                   | Etanercept       | <ul style="list-style-type: none"> <li>Dosis: 25mg o 50 mg.</li> <li>– Vía: subcutánea.</li> <li>– Frecuencia: 25mg 2 veces por semana</li> </ul>                                                                                    | <ul style="list-style-type: none"> <li>– EA activa grave con respuesta inadecuada a la terapia convencional.</li> </ul>                                                                                                                                                  | <ul style="list-style-type: none"> <li>– Hipersensibilidad al principio activo o excipientes.</li> <li>– Sepsis o riesgo de sepsis.</li> </ul>                                                                                                  | <ul style="list-style-type: none"> <li>– Muy frecuentes: reacción en el lugar de inyección, infección respiratoria, urinaria, cutánea.</li> <li>– Frecuentes: alergia, autoanticuerpos</li> </ul>                                                                                                                                                                                                               |

|  |            |                                                                                                                                                                                                                                                                                                                  |                                                                                                                                                                                                                                                                              |                                                                                                                                                                                                                                                                                       |                                                                                                                                                                                                                                                                                                                                                                                                                                                                                        |
|--|------------|------------------------------------------------------------------------------------------------------------------------------------------------------------------------------------------------------------------------------------------------------------------------------------------------------------------|------------------------------------------------------------------------------------------------------------------------------------------------------------------------------------------------------------------------------------------------------------------------------|---------------------------------------------------------------------------------------------------------------------------------------------------------------------------------------------------------------------------------------------------------------------------------------|----------------------------------------------------------------------------------------------------------------------------------------------------------------------------------------------------------------------------------------------------------------------------------------------------------------------------------------------------------------------------------------------------------------------------------------------------------------------------------------|
|  |            | (intervalo de 72-96 horas); 50mg una vez a la semana.                                                                                                                                                                                                                                                            | -EspAax- nr grave, con signos objetivos de inflamación (PCR elevada y/o imagen por RM) con respuesta inadecuada o intolerantes a AINE.                                                                                                                                       | -Infecciones activas (incluyendo crónicas o localizadas).                                                                                                                                                                                                                             | -Poco frecuentes: infecciones graves, trombopenia, psoriasis.<br>- Raros: pancitopenia, TBC, LES.                                                                                                                                                                                                                                                                                                                                                                                      |
|  | Golimumab  | <ul style="list-style-type: none"> <li>- Dosis: 50 mg</li> <li>- Vía: subcutánea</li> <li>- Frecuencia: 1 vez al mes, el mismo día de cada mes.</li> <li>- Dosis alternativa Pacientes peso &gt;100 Kg: 100mg</li> <li>-Vía subcutánea</li> <li>- Frecuencia: 1 vez al mes, el mismo día de cada mes.</li> </ul> | <ul style="list-style-type: none"> <li>- EA activa grave con respuesta inadecuada a la terapia convencional.</li> <li>-EspAax-nr activa grave con signos objetivos de inflamación (PCR elevada y/o imagen por RM) con respuesta inadecuada o intolerantes a AINE.</li> </ul> | <ul style="list-style-type: none"> <li>- Hipersensibilidad al principio activo o excipientes.</li> <li>- TBC activa, infecciones graves como sepsis o infecciones oportunistas.</li> <li>- IC moderada o grave (NYHA clases III/IV).</li> </ul>                                       | <ul style="list-style-type: none"> <li>- Muy frecuentes: infección tracto respiratorio superior.</li> <li>- Frecuentes: celulitis, herpes, bronquitis, sinusitis, HTA, infecciones fúngicas superficiales, anemia, anticuerpos, reacción alérgica, depresión, insomnio, cefalea.</li> <li>- Poco frecuentes: TBC, ICC, sepsis, neoplasias, ↑ glucosa, lípidos, trombosis, arritmia, trastornos oculares.</li> <li>- Raros: reactivación hepatitis B, linfoma, pancitopenia.</li> </ul> |
|  | Infliximab | <ul style="list-style-type: none"> <li>- Dosis (según peso corporal): 5mg/kg</li> <li>- Vía: perfusión IV durante 2 h</li> <li>- Frecuencia: tras primera dosis, Otras a las 2 y 6 semanas. Después 1 cada 6-8 semanas</li> </ul>                                                                                | <ul style="list-style-type: none"> <li>- EA activa grave con respuesta inadecuada a la terapia convencional.</li> <li>- Deberá administrarse en combinación con MTX, o usarse en monoterapia si contraindicación o Intolerancia al mismo.</li> </ul>                         | <ul style="list-style-type: none"> <li>-Hipersensibilidad al principio activo, excipientes u otras proteínas murinas.</li> <li>- TBC activa, infecciones graves como septicemia, abscesos e infecciones oportunistas.</li> <li>- IC moderada a grave (NYHA clases III/IV).</li> </ul> | <ul style="list-style-type: none"> <li>- Muy frecuentes: reacción infusional</li> <li>- Frecuentes: cefalea, infección respiratoria, herpes, diarrea.</li> <li>- Poco frecuentes: LES, TBC, sepsis, citopenia.</li> <li>- Raros: ICC, esclerosis múltiple, linfoma.</li> </ul>                                                                                                                                                                                                         |

|             |             |                                                                                                                                                      |                                                                  |                                                                                                                                                  |                                                                                                                                                                                                                                                             |
|-------------|-------------|------------------------------------------------------------------------------------------------------------------------------------------------------|------------------------------------------------------------------|--------------------------------------------------------------------------------------------------------------------------------------------------|-------------------------------------------------------------------------------------------------------------------------------------------------------------------------------------------------------------------------------------------------------------|
| anti-IL-17A | Secukinumab | -Dosis: 150 mg<br>-Vía: subcutánea<br>-Frecuencia: Inicio en la semana 0, 1, 2 y 3. Luego, mensualmente de mantenimiento, comenzando en la semana 4. | -EA activa con respuesta inadecuada al tratamiento convencional. | -Hipersensibilidad grave al principio activo, o a algunos de sus excipientes.<br>-Infecciones activas clínicamente relevantes (ej.: TBC activa). | -Muy frecuentes: Infecciones de vías respiratorias altas.<br>-Frecuentes: Herpes oral, rinorrea, diarrea.<br>-Poco frecuentes: urticaria, conjuntivitis, neutropenia, candidiasis oral, pie de atleta, otitis externa.<br>-Raros: reacciones anafilácticas. |
|-------------|-------------|------------------------------------------------------------------------------------------------------------------------------------------------------|------------------------------------------------------------------|--------------------------------------------------------------------------------------------------------------------------------------------------|-------------------------------------------------------------------------------------------------------------------------------------------------------------------------------------------------------------------------------------------------------------|

*EA: espondilitis anquilosante; EspA: espondiloartritis; FAME: fármacos modificadores de la enfermedad; HTA: hipertensión arterial; IC: insuficiencia cardíaca; ICC: insuficiencia cardíaca congestiva; iv: intravenoso; MTX: metotrexato; LES: lupus eritematoso sistémico; NYHA: New York Heart Association; TBC: tuberculosis; TNF: factor de necrosis tumoral.*

*Los datos de la presente tabla están obtenidos de la ficha técnica de la Agencia Española del Medicamento y Productos Sanitarios (AEMPS).*

*\* Eventos adversos: muy frecuentes (al menos 1 de cada 10 pacientes); frecuentes (al menos 1 de cada 100 pacientes); poco frecuentes (al menos 1 de cada 1.000 y menos de 1 de cada 100); raros (al menos 1 de cada 10.000 y menos de 1 de cada 1.000 pacientes).*
